# Supplementary material for: Exotic magnetism in As-doped α/β-In2Se3 monolayers with tunable anisotropic carrier mobility
Source: Royal Society of Chemistry journal article supplement (doi:10.1039/c9cp02746g), 2019-01-01
Supplement: c9cp02746g1.pdf [file c9cp02746g1.pdf]

## Exotic magnetism in As-doped $\alpha/\beta$ -In<sub>2</sub>Se<sub>3</sub> monolayers with tunable anisotropic carrier mobility

Xiaoteng Li,<sup>1</sup> Xi Zuo,<sup>1</sup> Heming Li,<sup>1</sup> Li Han,<sup>1</sup> Quan Gao,<sup>1</sup> Dongmei Li,<sup>1</sup> Bin Cui,<sup>1,\*</sup>  
Desheng Liu<sup>1,2,\*</sup> and Fanyao Qu<sup>3</sup>

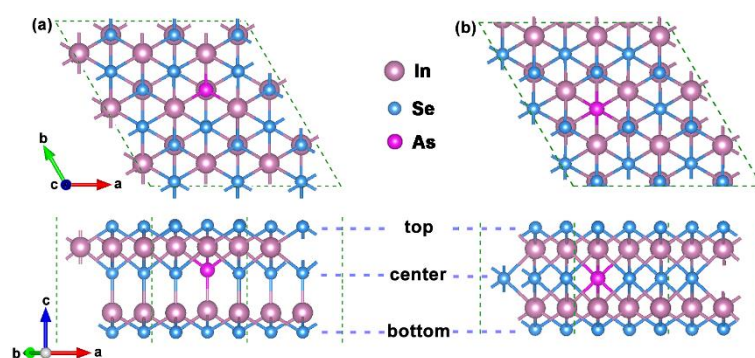

Figure S1 Top (upper panels) and side (lower panels) views of an arsenic substitution on the Se site (As<sub>Se</sub>) in  $\alpha$ -In<sub>2</sub>Se<sub>3</sub> (left panels) and  $\beta$ -In<sub>2</sub>Se<sub>3</sub> (right panels), respectively. The layers of Se sites located are indicated by top, center and bottom.

In the 3×3 supercell, one Se atom is replaced by one As atom. Because the Se atoms on different layers show different valence, three configurations are considered, i.e., the defect on the top layer (As<sub>Se-top</sub>), center layer (As<sub>Se-center</sub>) and bottom layer (As<sub>Se-bottom</sub>).

<sup>1</sup> School of Physics, State Key Laboratory of Crystal Materials, Shandong University, Jinan 250100, People's Republic of China.  
E-mail: cuibin@sdu.edu.cn; liuds@sdu.edu.cn.

<sup>2</sup> Department of Physics, Jining University, Qufu 273155, People's Republic of China

<sup>3</sup> Institute of Physics, University of Brasilia, Brasilia-DF 70919-970, Brazil

Table S1 The formation energies of  $\alpha/\beta$ -In<sub>2</sub>Se<sub>3</sub> and they with As<sub>Se</sub> defects.

|                                                                         | Formation energy (eV/Å <sup>2</sup> ) |
|-------------------------------------------------------------------------|---------------------------------------|
| $\alpha$ -In <sub>2</sub> Se <sub>3</sub>                               | -0.1784                               |
| $\alpha$ -In <sub>2</sub> Se <sub>3</sub> with As <sub>Se</sub> -top    | -0.1635                               |
| $\alpha$ -In <sub>2</sub> Se <sub>3</sub> with As <sub>Se</sub> -center | -0.1665                               |
| $\alpha$ -In <sub>2</sub> Se <sub>3</sub> with As <sub>Se</sub> -bottom | -0.1687                               |
| $\beta$ -In <sub>2</sub> Se <sub>3</sub>                                | -0.1788                               |
| $\beta$ -In <sub>2</sub> Se <sub>3</sub> with As <sub>Se</sub> -top     | -0.1637                               |
| $\beta$ -In <sub>2</sub> Se <sub>3</sub> with As <sub>Se</sub> -center  | -0.1658                               |
| $\beta$ -In <sub>2</sub> Se <sub>3</sub> with As <sub>Se</sub> -bottom  | -0.1638                               |

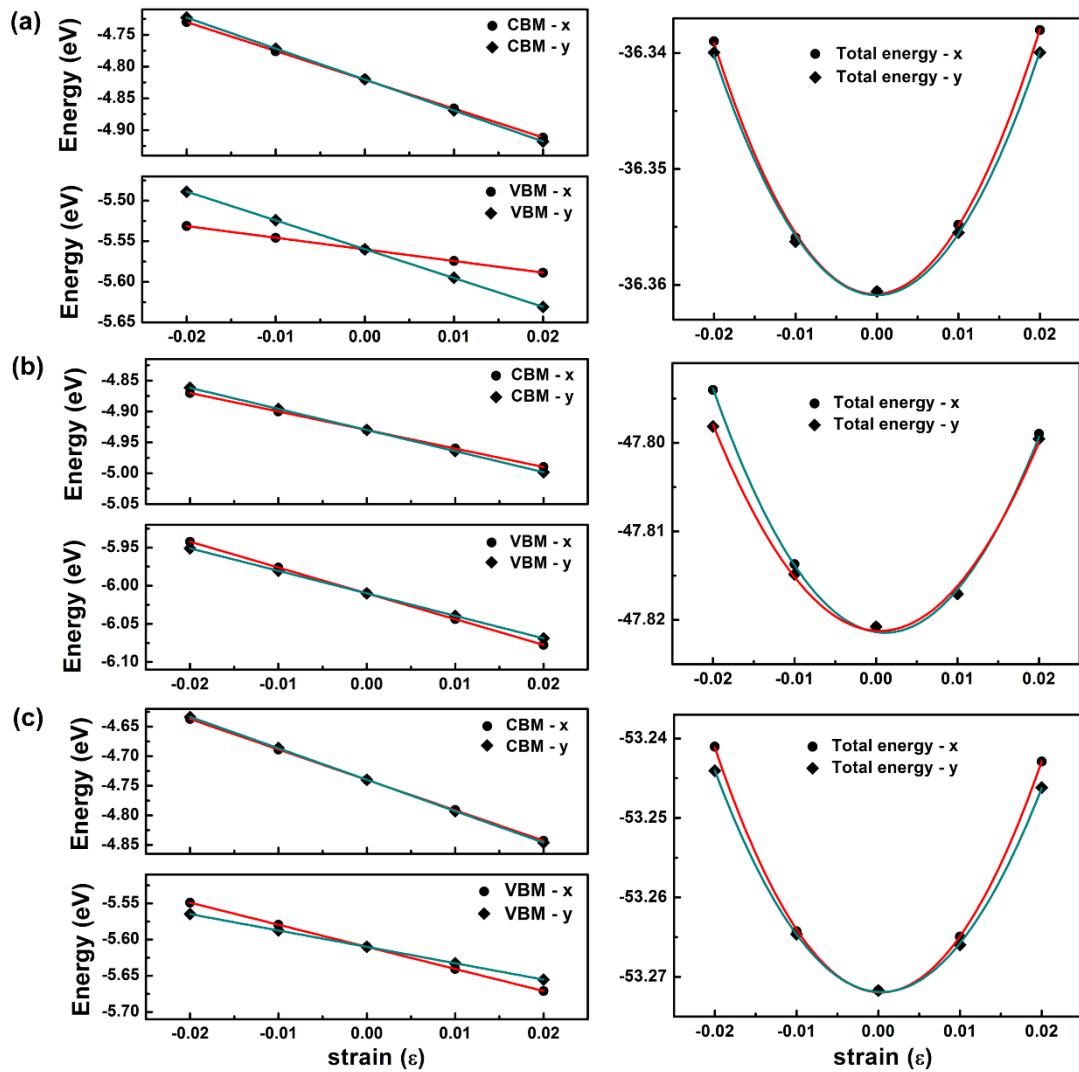

Figure S2. Linear fitting of band edges and quadratic fitting of total energy as a function of uniaxial strain for (a)  $\alpha$ -In<sub>2</sub>Se<sub>3</sub> (b)  $\alpha$ -In<sub>2</sub>Se<sub>3</sub>-O<sub>2</sub> (c)  $\alpha$ -In<sub>2</sub>Se<sub>3</sub>-H<sub>2</sub>O monolayers.

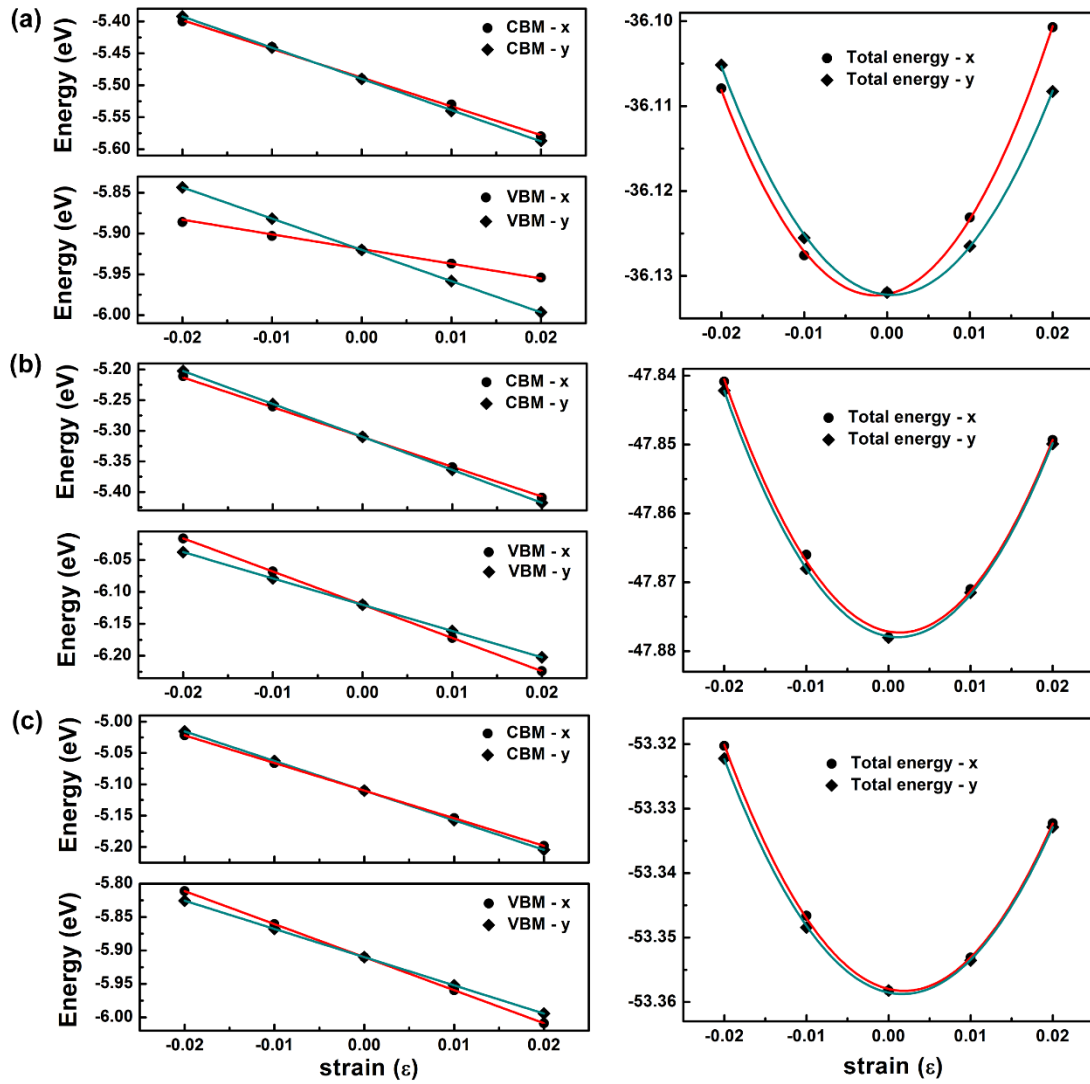

Figure S3. Linear fitting of band edges and quadratic fitting of total energy as a function of uniaxial strain for (a)  $\beta$ -In<sub>2</sub>Se<sub>3</sub> (b)  $\beta$ -In<sub>2</sub>Se<sub>3</sub>-O<sub>2</sub> (c)  $\beta$ -In<sub>2</sub>Se<sub>3</sub>-H<sub>2</sub>O monolayers.
